# Supplementary material
Source: PubMed Central journal article supplement (PMC3126651)
Supplement: supp_111.179390_JPET179390__Supplementary_Figures_and_Tables.pdf [file supp_111.179390_JPET179390__Supplementary_Figures_and_Tables.pdf]

**Increased Activation of Wnt/ $\beta$ -catenin Pathway in Spontaneous Hepatocellular Carcinoma observed in Farnesoid X Receptor Knockout Mice.** Wolfe A, Thomas A, Edwards G, Jaseja R, Guo GL, and Apte U. **Journal of Pharmacology and Experimental Therapeutics**

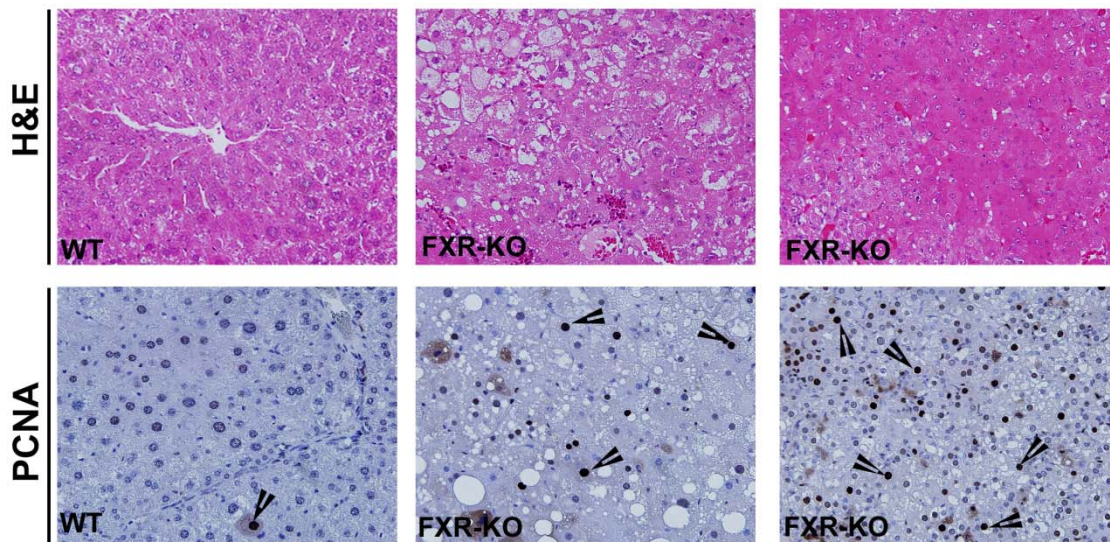

**Supplementary Figure 1.** Pathological characteristics of spontaneous HCC in FXR-KO mice. *Upper panel,* Representative photographs of H&E stained paraffin sections of livers from WT and FXR-KO mice. *Lower panel,* Representative photographs of the PCNA immunohistochemistry on liver sections from WT and FXR-KO livers. Arrowheads point to cells in S-phase of cell cycle. Magnification 400x.

**Increased Activation of Wnt/ $\beta$ -catenin Pathway in Spontaneous Hepatocellular Carcinoma observed in Farnesoid X Receptor Knockout Mice.** Wolfe A, Thomas A, Edwards G, Jaseja R, Guo GL, and Apte U. **Journal of Pharmacology and Experimental Therapeutics**

**Supplementary Table 1.** Clinical Characteristics of normal and HCC samples used in the study.

| Gender | Age | Diagnosis                | Tumor Grade                        | Stage |
|--------|-----|--------------------------|------------------------------------|-------|
| Male   | 81  | Normal                   | N/A                                | N/A   |
| Male   | 73  | Normal                   | N/A                                | N/A   |
| Male   | 71  | Normal                   | N/A                                | N/A   |
| Male   | 86  | Normal                   | N/A                                | N/A   |
| Male   | 52  | Normal                   | N/A                                | N/A   |
| Female | 33  | Normal                   | N/A                                | N/A   |
| Male   | 66  | Normal                   | N/A                                | N/A   |
| Male   | 68  | Normal                   | N/A                                | N/A   |
| Male   | 81  | Hepatocellular Carcinoma | AJCC G1: Well differentiated       | I     |
| Male   | 79  | Hepatocellular Carcinoma | AJCC G2: Moderately differentiated | I     |
| Female | 61  | Hepatocellular Carcinoma | AJCC G1: Well differentiated       | I     |
| Female | 58  | Hepatocellular Carcinoma | Unknown                            | I     |
| Male   | 66  | Hepatocellular Carcinoma | AJCC G3: Poorly differentiated     | I     |
| Female | 62  | Cholangiocarcinoma       | AJCC G2: Moderately differentiated | I     |
| Female | 78  | Cholangiocarcinoma       | AJCC G2: Moderately differentiated | I     |
| Female | 63  | Hepatocellular Carcinoma | AJCC G2: Moderately differentiated | II    |

**Increased Activation of Wnt/ $\beta$ -catenin Pathway in Spontaneous Hepatocellular Carcinoma observed in Farnesoid X Receptor Knockout Mice.** Wolfe A, Thomas A, Edwards G, Jaseja R, Guo GL, and Apte U. **Journal of Pharmacology and Experimental Therapeutics**

|        |    |                          |                                    |      |
|--------|----|--------------------------|------------------------------------|------|
| Male   | 73 | Hepatocellular Carcinoma | AJCC G2: Moderately differentiated | II   |
| Male   | 68 | Hepatocellular Carcinoma | Not Reported                       | II   |
| Male   | 60 | Hepatocellular Carcinoma | AJCC G3: Poorly differentiated     | II   |
| Female | 62 | Hepatocellular Carcinoma | AJCC G1: Well differentiated       | II   |
| Male   | 60 | Hepatocellular Carcinoma | AJCC G2: Moderately differentiated | II   |
| Male   | 77 | Hepatocellular Carcinoma | AJCC G1: Well differentiated       | II   |
| Male   | 63 | Hepatocellular Carcinoma | AJCC G2: Moderately differentiated | II   |
| Female | 39 | Hepatocellular Carcinoma | AJCC G1: Well differentiated       | IIIA |
| Male   | 43 | Hepatocellular Carcinoma | AJCC G3: Poorly differentiated     | IIIA |
| Female | 79 | Hepatocellular Carcinoma | AJCC G2: Moderately differentiated | IIIA |
| Male   | 56 | Hepatocellular Carcinoma | AJCC G2: Moderately differentiated | IIIA |
| Male   | 71 | Hepatocellular Carcinoma | AJCC G2: Moderately differentiated | IIIA |
| Male   | 86 | Hepatocellular Carcinoma | AJCC G1: Well differentiated       | IIIA |
| Male   | 26 | Hepatocellular Carcinoma | AJCC G2: Moderately differentiated | IIIA |
| Male   | 68 | Hepatocellular Carcinoma | AJCC G2: Moderately differentiated | IIIA |

**Increased Activation of Wnt/ $\beta$ -catenin Pathway in Spontaneous Hepatocellular Carcinoma observed in Farnesoid X Receptor Knockout Mice.** Wolfe A, Thomas A, Edwards G, Jaseja R, Guo GL, and Apte U. **Journal of Pharmacology and Experimental Therapeutics**

|      |    |                                         |                                    |    |
|------|----|-----------------------------------------|------------------------------------|----|
| Male | 21 | Hepatocellular Carcinoma                | AJCC G2: Moderately differentiated | IV |
| Male | 70 | Hepatocellular Carcinoma, metastatic    | AJCC G3: Poorly differentiated     | IV |
| Male | 66 | Cholangiocarcinoma of liver, metastatic | Unknown                            | IV |
